# Supplementary material for: How Does the Seed Pre-Germinative Metabolism Fight Against Imbibition Damage? Emerging Roles of Fatty Acid Cohort and Antioxidant Defence
Source: Front Plant Sci. 2019 Nov 21;10:1505. doi: 10.3389/fpls.2019.01505 (PMC6881478; doi:10.3389/fpls.2019.01505)
Supplement: Supplementary file 2 [file DataSheet_2.xlsx]

## Sheet: Dry weight normalized
	University of Pavia UPAV-01-15VW Seed germination
	Heat map of statistically significant biochemicals profiled in this study. Red and green shaded cells indicate p≤0.05 (red indicates that the mean values are significantly higher for that comparison; green values significantly lower). Light red and light green shaded cells indicate 0.05<p<0.10 (light red indicates that the mean values trend higher for that comparison; light green values trend low…							Fold changes			Grey are siginificant									% Detected by Group in RAW Data				Chemical Properties
											W2_WT / DS_WT		W8_WT / W2_WT			DRY WEIGHT-NORMALIZED
	Pathway Order	Alpha	Comp ID	Super Pathway	Sub Pathway	Biochemical Name	X	W2** / DS**	W8** / W2**	X	p-value	q-value	p-value	q-value	X	DS**	W2**	W8**	X	DS	W2	W8	X	Biochemical Name	Super Pathway	Sub Pathway	Chemical ID	KEGG	PlantCyc	PUBCHEM	CAS	Platform	RI	Mass
	1	212	58	Amino acid	Serine family (phosphoglycerate derived)	glycine		0.92	0.74		0.535	0.3705	0.0096	0.0619		1.1986	1.1017	0.8159		100	100	100		glycine	Amino acid	Serine family (phosphoglycerate derived)	340	C00037	GLY	750	56-40-6	LC/MS pos early	1375	76.0393
	3	362	1648	Amino acid	Serine family (phosphoglycerate derived)	serine		1.49	1.66		0.0219	0.1278	0.0009	0.0323		0.4627	0.6895	1.1417		100	100	100		serine	Amino acid	Serine family (phosphoglycerate derived)	503	C00065	SER	5951	56-45-1	LC/MS pos early	1239	106.05
	7	295	37076	Amino acid	Serine family (phosphoglycerate derived)	N-acetylserine		1.11	1.1		0.1896	0.2252	0.2391	0.307		0.7938	0.8793	0.9708		100	100	100		N-acetylserine	Amino acid	Serine family (phosphoglycerate derived)	100001851		ACETYLSERINE	65249	97-14-3	LC/MS pos early	811	148.06
	10	379	46960	Amino acid	Serine family (phosphoglycerate derived)	sulfate*		1.12	0.94		0.2016	0.2327	0.3677	0.385		0.9258	1.036	0.975		100	100	100		sulfate*	Amino acid	Serine family (phosphoglycerate derived)	100002528	C00059		1118	14808-79-8	LC/MS neg	616	96.9601
	13	148	56	Amino acid	Serine family (phosphoglycerate derived)	cystine		0.6	0.23		0.0814	0.1605	0.0066	0.0575		1.6164	0.9772	0.2202		100	100	0		cystine	Amino acid	Serine family (phosphoglycerate derived)	279	C00491	CYSTINE	67678	56-89-3	LC/MS polar	3424	239.017
	17	231	590	Amino acid	Serine family (phosphoglycerate derived)	hypotaurine		1.48	0.46		0.0612	0.1539	0.0264	0.1		1.0788	1.5975	0.7292		100	100	100		hypotaurine	Amino acid	Serine family (phosphoglycerate derived)	358	C00519		107812	300-84-5	LC/MS pos early	724	110.027
	39	302	43549	Amino acid	Aromatic amino acid metabolism (PEP derived)	N-formylanthranilic acid		1.3	1.12		0.1143	0.1839	0.4612	0.4094		0.661	0.8606	0.9651		100	100	100		N-formylanthranilic acid	Amino acid	Aromatic amino acid metabolism (PEP derived)	100004561	C05653		101399	3342-77-6	LC/MS polar	900	164.035
	40	393	54	Amino acid	Aromatic amino acid metabolism (PEP derived)	tryptophan		1.03	1.12		0.7421	0.4333	0.1504	0.2333		0.9341	0.9607	1.0765		100	100	100		tryptophan	Amino acid	Aromatic amino acid metabolism (PEP derived)	565	C00078	TRP	6305	73-22-3	LC/MS pos early	2986	205.097
	60	335	64	Amino acid	Aromatic amino acid metabolism (PEP derived)	phenylalanine		1.08	1.1		0.5628	0.3727	0.1737	0.2529		0.8935	0.964	1.0642		100	100	100		phenylalanine	Amino acid	Aromatic amino acid metabolism (PEP derived)	460	C00079	PHE	6140	63-91-2	LC/MS pos early	2878	166.086
	71	394	1603	Amino acid	Aromatic amino acid metabolism (PEP derived)	tyramine		0.86	0.93		0.4071	0.3197	0.7466	0.5464		1.4531	1.2449	1.1608		100	100	100		tyramine	Amino acid	Aromatic amino acid metabolism (PEP derived)	1133	C00483	TYRAMINE	5610	60-19-5	LC/MS pos early	2540	138.091
	78	67	32197	Amino acid	Aromatic amino acid metabolism (PEP derived)	3-(4-hydroxyphenyl)lactate		1.91	0.73		0.1323	0.1966	0.4604	0.4094		0.9652	1.8482	1.3511		100	100	100		3-(4-hydroxyphenyl)lactate	Amino acid	Aromatic amino acid metabolism (PEP derived)	240	C03672	CPD-2222	9378	6482-98-0	LC/MS neg	1379	181.051
	121	121	443	Amino acid	Aspartate family (OAA derived)	aspartate		0.27	4.97		0.0023	0.0768	0.0011	0.0331		0.8855	0.2418	1.2025		100	100	100		aspartate	Amino acid	Aspartate family (OAA derived)	234	C00049	L-ASPARTATE	5960	56-84-8	LC/MS pos early	1165	134.045
	122	228	18351	Amino acid	Aspartate family (OAA derived)	homoserine		1.11	0.82		0.482	0.3476	0.183	0.2574		1.0805	1.2035	0.9903		100	100	100		homoserine	Amino acid	Aspartate family (OAA derived)	100000458	C00263	HOMO-SER	12647	672-15-1	LC/MS pos early	1469	120.066
	127	385	1284	Amino acid	Aspartate family (OAA derived)	threonine		1.26	1.73		0.0955	0.1715	0.0402	0.1247		0.564	0.7091	1.2272		100	100	100		threonine	Amino acid	Aspartate family (OAA derived)	564	C00188	THR	6288	72-19-5	LC/MS pos early	1514	120.066
	131	120	512	Amino acid	Aspartate family (OAA derived)	asparagine		0.99	1.14		0.9199	0.4886	0.1236	0.2186		0.881	0.8733	0.9976		100	100	100		asparagine	Amino acid	Aspartate family (OAA derived)	917	C00152	ASN	6267	70-47-3	LC/MS pos early	1225	133.061
	134	256	1301	Amino acid	Aspartate family (OAA derived)	lysine		1.35	1.48		0.0692	0.1539	0.0009	0.0323		0.5489	0.7388	1.0916		100	100	100		lysine	Amino acid	Aspartate family (OAA derived)	407	C00047	LYS	5962	56-87-1	LC/MS pos early	2850	147.113
	136	356	1495	Amino acid	Aspartate family (OAA derived)	saccharopine		0.35	20.38		0.027	0.1278	0.0012	0.0331		0.2917	0.1027	2.0935		100	33	100		saccharopine	Amino acid	Aspartate family (OAA derived)	392	C00449	SACCHAROPINE	160556	997-68-2	LC/MS pos early	2530	277.139
	138	45	6146	Amino acid	Aspartate family (OAA derived)	2-aminoadipate		1.03	1.78		0.7542	0.4357	0.0135	0.0693		0.6234	0.6414	1.1431		100	100	100		2-aminoadipate	Amino acid	Aspartate family (OAA derived)	381	C00956	CPD-468	469	542-32-5;1118-90-7	LC/MS pos early	1912	162.076
	139	65	38347	Amino acid	Aspartate family (OAA derived)	2-oxoadipate		0.8	1.09		0.4828	0.3476	0.8238	0.5682		0.8865	0.7094	0.7724		100	100	67		2-oxoadipate	Amino acid	Aspartate family (OAA derived)	92	C00322	2K-ADIPATE	71	3184-35-8	LC/MS polar	2633.1	159.03
	140	52	31934	Amino acid	Aspartate family (OAA derived)	2-hydroxyadipate		1.25	0.88		0.3251	0.2831	0.1493	0.2333		0.8705	1.0877	0.954		100	100	100		2-hydroxyadipate	Amino acid	Aspartate family (OAA derived)	100001153	C02360		193530	18294-85-4	LC/MS polar	3000	161.046
	141	95	43231	Amino acid	Aspartate family (OAA derived)	6-oxopiperidine-2-carboxylate		0.72	0.4		0.2182	0.2405	0.0136	0.0693		2.2239	1.5929	0.6397		100	100	100		6-oxopiperidine-2-carboxylate	Amino acid	Aspartate family (OAA derived)	100004499			3014237	34622-39-4	LC/MS polar	1692	142.051
	146	265	1302	Amino acid	Aspartate family (OAA derived)	methionine		1.18	1.32		0.1792	0.2211	0.0403	0.1247		0.7008	0.8285	1.0965		100	100	100		methionine	Amino acid	Aspartate family (OAA derived)	415	C00073	MET	6137	63-68-3	LC/MS pos early	2526	150.058
	148	357	42382	Amino acid	Aspartate family (OAA derived)	S-adenosylhomocysteine (SAH)		0.74	0.9		0.1142	0.1839	0.0256	0.0992		1.5308	1.1401	1.0213		100	100	100		S-adenosylhomocysteine (SAH)	Amino acid	Aspartate family (OAA derived)	197	C00021	ADENOSYL-HOMO-CYS	439155	979-92-0	LC/MS neg	1832.4	383.114
	150	266	44878	Amino acid	Aspartate family (OAA derived)	methionine sulfone		1.07	0.87		0.4239	0.3197	0.003	0.0409		0.9974	1.0636	0.9206		100	100	100		methionine sulfone	Amino acid	Aspartate family (OAA derived)	100004635			69961	820-10-0	LC/MS pos early	1250	182.048
	151	267	18374	Amino acid	Aspartate family (OAA derived)	methionine sulfoxide		1.23	1.57		0.2424	0.2454	0.0241	0.0958		0.6496	0.7985	1.2497		100	100	100		methionine sulfoxide	Amino acid	Aspartate family (OAA derived)	100000039	C02989	L-Methionine-sulfoxides	158980	3226-65-1	LC/MS pos early	1272	166.053
	155	292	45428	Amino acid	Aspartate family (OAA derived)	N-acetylmethionine sulfoxide		1.63	1.29		0.0731	0.1557	0.0438	0.1321		0.5813	0.9485	1.2267		100	100	100		N-acetylmethionine sulfoxide	Amino acid	Aspartate family (OAA derived)	100005463			193368	108646-71-5	LC/MS pos early	880	208.064
	157	105	1126	Amino acid	Aspartate family (OAA derived)	alanine		1.33	1.26		0.0304	0.1278	0.0448	0.1321		0.6578	0.8747	1.1048		100	100	100		alanine	Amino acid	Aspartate family (OAA derived)	811	C00041	L-ALPHA-ALANINE	5950	56-41-7	LC/MS pos early	1700	90.055
	208	200	53	Amino acid	Glutamate family (alpha-ketoglutarate derived)	glutamine		4.77	0.58		4.1275e-05	0.0043	0.0109	0.0646		0.2305	1.0987	0.6338		100	100	100		glutamine	Amino acid	Glutamate family (alpha-ketoglutarate derived)	563	C00064	GLN	5961	56-85-9	LC/MS pos early	1291	147.076
	160	276	1498	Amino acid	Aspartate family (OAA derived)	N6,N6,N6-trimethyllysine		0.86	1.05		0.2968	0.2687	0.4475	0.4058		1.1208	0.9624	1.0087		100	100	100		N6,N6,N6-trimethyllysine	Amino acid	Aspartate family (OAA derived)	189	C03793		440120	23284-33-5	LC/MS pos early	2825	189.16
	162	283	33942	Amino acid	Aspartate family (OAA derived)	N-acetylasparagine		1.04	0.36		0.5594	0.3727	0.0123	0.0668		1.9712	2.0599	0.735		100	100	100		N-acetylasparagine	Amino acid	Aspartate family (OAA derived)	100001257			99715	4033-40-3	LC/MS pos early	785	175.071
	163	284	22185	Amino acid	Aspartate family (OAA derived)	N-acetylaspartate (NAA)		0.78	0.33		0.5706	0.3743	0.0201	0.0854		1.2486	0.9742	0.3231		100	100	33		N-acetylaspartate (NAA)	Amino acid	Aspartate family (OAA derived)	100000787	C01042		65065	997-55-7;997-55-7	LC/MS polar	3143	174.041
	165	291	1589	Amino acid	Aspartate family (OAA derived)	N-acetylmethionine		1.5	0.96		0.005	0.0768	0.538	0.4437		0.6692	1.0009	0.9581		100	100	100		N-acetylmethionine	Amino acid	Aspartate family (OAA derived)	1083	C02712		448580	65-82-7	LC/MS neg	1787	190.054
	198	118	1638	Amino acid	Glutamate family (alpha-ketoglutarate derived)	arginine		1.07	1		0.3743	0.3033	0.9575	0.6115		0.8601	0.9217	0.9212		100	100	100		arginine	Amino acid	Glutamate family (alpha-ketoglutarate derived)	231	C00062	ARG	232	1119-34-2	LC/MS pos early	2825	175.119
	201	141	2132	Amino acid	Glutamate family (alpha-ketoglutarate derived)	citrulline		1.12	0.86		0.2206	0.2405	0.0582	0.155		0.9815	1.1012	0.9461		100	100	100		citrulline	Amino acid	Glutamate family (alpha-ketoglutarate derived)	391	C00327	L-CITRULLINE	9750	372-75-8	LC/MS pos early	1520	176.103
	203	160	36808	Amino acid	Glutamate family (alpha-ketoglutarate derived)	dimethylarginine (SDMA + ADMA)		1.14	1.29		0.3593	0.2967	0.0073	0.0575		0.7151	0.8142	1.051		100	100	100		dimethylarginine (SDMA + ADMA)	Amino acid	Glutamate family (alpha-ketoglutarate derived)	100001810	C03626		123831	102783-24-4	LC/MS pos early	2850	203.15
	205	177	1416	Amino acid	Glutamate family (alpha-ketoglutarate derived)	gamma-aminobutyrate (GABA)		1.87	1.26		0.0006	0.0292	0.0152	0.0718		0.4587	0.8564	1.0779		100	100	100		gamma-aminobutyrate (GABA)	Amino acid	Glutamate family (alpha-ketoglutarate derived)	141	C00334	4-AMINO-BUTYRATE	119	56-12-2	LC/MS pos early	2048	104.071
	206	198	57	Amino acid	Glutamate family (alpha-ketoglutarate derived)	glutamate		1.05	1.29		0.5946	0.3827	0.0101	0.0619		0.7792	0.8174	1.0554		100	100	100		glutamate	Amino acid	Glutamate family (alpha-ketoglutarate derived)	561	C00025	GLT	611	56-86-0	LC/MS pos early	1500	148.06
	219	289	33943	Amino acid	Glutamate family (alpha-ketoglutarate derived)	N-acetylglutamine		8.42	0.23		0.0002	0.0125	0.002	0.0366		0.2836	2.3881	0.5609		100	100	100		N-acetylglutamine	Amino acid	Glutamate family (alpha-ketoglutarate derived)	100001253	C02716		182230	2490-97-3	LC/MS pos early	845	189.087
	211	225	1574	Amino acid	Glutamate family (alpha-ketoglutarate derived)	histamine		0.77	1.71		0.1835	0.2217	0.0351	0.1188		0.897	0.6909	1.1831		67	0	100		histamine	Amino acid	Glutamate family (alpha-ketoglutarate derived)	354	C00388		774	51-45-6	LC/MS pos early	3035	112.087
	212	226	59	Amino acid	Glutamate family (alpha-ketoglutarate derived)	histidine		1.16	1.56		0.0199	0.1278	0.0061	0.0566		0.6571	0.762	1.188		100	100	100		histidine	Amino acid	Glutamate family (alpha-ketoglutarate derived)	355	C00135	HIS	6274	5934-29-2	LC/MS neg	755.9	154.062
	218	288	15720	Amino acid	Glutamate family (alpha-ketoglutarate derived)	N-acetylglutamate		0.88	2.29		0.1623	0.2149	0.0002	0.0131		0.7653	0.6765	1.5512		100	100	100		N-acetylglutamate	Amino acid	Glutamate family (alpha-ketoglutarate derived)	100000282	C00624	ACETYL-GLU	70914	5817-08-03	LC/MS pos early	1050	190.071
	294	89	22116	Amino acid	Branched Chain Amino Acids (pyruvate derived)	4-methyl-2-oxopentanoate		2.1	1.43		0.0076	0.0768	0.1602	0.2416		0.4581	0.9636	1.3776		100	100	100		4-methyl-2-oxopentanoate	Amino acid	Branched Chain Amino Acids (pyruvate derived)	100000551	C00233	2K-4CH3-PENTANOATE&redirect=T	70	816-66-0	LC/MS neg	2170	129.056
	220	290	33946	Amino acid	Glutamate family (alpha-ketoglutarate derived)	N-acetylhistidine		0.98	1.02		0.9851	0.5039	0.7669	0.5565		0.9962	0.9778	0.9997		100	100	100		N-acetylhistidine	Amino acid	Glutamate family (alpha-ketoglutarate derived)	100001293	C02997		75619	39145-52-3	LC/MS pos early	2065	198.087
	226	341	1898	Amino acid	Glutamate family (alpha-ketoglutarate derived)	proline		1.29	1.06		0.0837	0.1605	0.3862	0.3882		0.7324	0.9437	1.0023		100	100	100		proline	Amino acid	Glutamate family (alpha-ketoglutarate derived)	480	C00148	PRO	145742	147-85-3	LC/MS pos early	1603	116.071
	354	181	2730	Amino acid	Glutathione metabolism	gamma-glutamylglutamine		4.72	0.65		0.002	0.0768	0.0996	0.202		0.2007	0.9483	0.6127		100	100	100		gamma-glutamylglutamine	Amino acid	Glutathione metabolism	1140	C05283		150914	10148-81-9	LC/MS pos early	1430	276.119
	249	312	43586	Amino acid	Glutamate family (alpha-ketoglutarate derived)	N-monomethylarginine		1.23	1.3		0.2027	0.2327	0.0208	0.0866		0.6592	0.8082	1.05		100	100	100		N-monomethylarginine	Amino acid	Glutamate family (alpha-ketoglutarate derived)	100004488	C03884		132862	53308-83-1	LC/MS pos early	2845	189.135
	250	82	15681	Amino acid	Glutamate family (alpha-ketoglutarate derived)	4-guanidinobutanoate		0.98	1.17		0.9489	0.4964	0.3209	0.3554		0.8865	0.8683	1.0147		100	100	100		4-guanidinobutanoate	Amino acid	Glutamate family (alpha-ketoglutarate derived)	100000096	C01035		500	463-003;463-00-3	LC/MS pos early	2320	146.092
	270	240	1125	Amino acid	Branched Chain Amino Acids (OAA derived)	isoleucine		1.21	1.23		0.127	0.193	0.0457	0.1331		0.7685	0.9294	1.1423		100	100	100		isoleucine	Amino acid	Branched Chain Amino Acids (OAA derived)	376	C00407	ILE	6306	73-32-5	LC/MS pos early	2800	132.102
	293	75	15676	Amino acid	Branched Chain Amino Acids (pyruvate derived)	3-methyl-2-oxovalerate		1.78	1.34		0.0063	0.0768	0.0118	0.0659		0.5044	0.8994	1.2019		100	100	100		3-methyl-2-oxovalerate	Amino acid	Branched Chain Amino Acids (pyruvate derived)	100000036	C00671	2-KETO-3-METHYL-VALERATE	47	1460-34-0;51829-07-3	LC/MS neg	2064.2	129.056
	427	204	1572	Carbohydrate	Photorespiration	glycerate		5.42	0.99		1.5308e-05	0.0032	0.8607	0.5855		0.1694	0.9184	0.9119		100	100	100		glycerate	Carbohydrate	Photorespiration	1052	C00258	GLYCERATE	752	600-19-1	LC/MS polar	2070.4	105.019
	298	109	46537	Amino acid	Branched Chain Amino Acids (pyruvate derived)	alpha-hydroxyisovalerate		0.69	0.71		0.0584	0.1539	0.0152	0.0718		1.5118	1.0374	0.7329		100	100	67		alpha-hydroxyisovalerate	Amino acid	Branched Chain Amino Acids (pyruvate derived)	100001300			99823	600-37-3	LC/MS polar	1052	117.056
	300	245	60	Amino acid	Branched Chain Amino Acids (pyruvate derived)	leucine		1.22	1.19		0.1199	0.1878	0.0755	0.1852		0.7795	0.9493	1.1284		100	100	100		leucine	Amino acid	Branched Chain Amino Acids (pyruvate derived)	397	C00123	LEU	6106	61-90-5	LC/MS pos early	2864	132.102
	303	271	15745	Amino acid	Branched Chain Amino Acids (pyruvate derived)	methylsuccinate		0.9	1.17		0.6696	0.4045	0.0178	0.0767		0.9765	0.8806	1.0259		100	100	100		methylsuccinate	Amino acid	Branched Chain Amino Acids (pyruvate derived)	2051		CPD-2461	10349	498-21-5	LC/MS polar	2800	131.035
	310	405	1649	Amino acid	Branched Chain Amino Acids (pyruvate derived)	valine		1.06	1.25		0.5683	0.3739	0.0218	0.0896		0.8204	0.8705	1.0881		100	100	100		valine	Amino acid	Branched Chain Amino Acids (pyruvate derived)	566	C00183	VAL	6287	72-18-4	LC/MS pos early	2479	118.086
	1309	400	1604	Nucleotide	Purine metabolism	urate		0	0.37		0.0064	0.0768	0.4713	0.4125		67.3612	0.3343	0.1225		100	67	33		urate	Nucleotide	Purine metabolism	1134	C00366	URATE	1175	69-93-2;120K5305	LC/MS pos early	776	169.036
	321	76	57747	Amino acid	Branched Chain Amino Acids (pyruvate derived)	3-methylglutaconate		0.71	1.03		0.1235	0.1905	0.6251	0.4875		1.3424	0.9572	0.9857		100	100	100		3-methylglutaconate	Amino acid	Branched Chain Amino Acids (pyruvate derived)	100002458			1551553	5746-90-7	LC/MS polar	2700	99.0452
	329	92	1419	Amino acid	Amines and polyamines	5-methylthioadenosine (MTA)		1	1.2				0.1488	0.2333		0.5028	0.5028	0.6032		0	0	100		5-methylthioadenosine (MTA)	Amino acid	Amines and polyamines	212	C00170	5-METHYLTHIOADENOSINE	439176	2457-80-9	LC/MS pos early	2752	298.097
	330	104	15496	Amino acid	Amines and polyamines	agmatine		0.82	3.26		0.4096	0.3197	0.0028	0.0409		0.3886	0.3191	1.0394		100	100	100		agmatine	Amino acid	Amines and polyamines	100000103	C00179	AGMATHINE	199	2482-00-0	LC/MS pos early	3057	131.129
	332	368	485	Amino acid	Amines and polyamines	spermidine		6.04	0.46		0.0056	0.0768	0.1814	0.2574		0.1776	1.0721	0.4978		67	100	100		spermidine	Amino acid	Amines and polyamines	50	C00315	SPERMIDINE	1102	124-20-9	LC/MS pos early	3355	146.165
	1357	399	605	Nucleotide	Pyrimidine metabolism	uracil		2.24	1.27		0.0034	0.0768	0.287	0.3418		0.4116	0.9229	1.1731		100	100	100		uracil	Nucleotide	Pyrimidine metabolism	825	C00106	URACIL	1174	66-22-8	LC/MS pos early	827	113.035
	348	321	34592	Amino acid	Glutathione metabolism	ophthalmate		0.8	2.82		0.4226	0.3197	0.0034	0.043		0.4782	0.384	1.0831		33	0	100		ophthalmate	Amino acid	Glutathione metabolism	100001311			7018721	495-27-2	LC/MS pos early	2085	290.135
	350	146	35159	Amino acid	Glutathione metabolism	cysteine-glutathione disulfide		0.87	1.03		0.4228	0.3197	0.9114	0.5967		0.9787	0.8499	0.8725		100	100	100		cysteine-glutathione disulfide	Amino acid	Glutathione metabolism	100001437			4247235	13081-14-6	LC/MS pos early	2465	427.095
	352	178	37063	Amino acid	Glutathione metabolism	gamma-glutamylalanine		0.85	1.7		0.6415	0.3988	0.0938	0.2007		0.6487	0.5529	0.9418		100	100	100		gamma-glutamylalanine	Amino acid	Glutathione metabolism	100001843			440103	5875-41-2	LC/MS pos early	1986	219.098
	159	277	36752	Amino acid	Aspartate family (OAA derived)	N6-acetyllysine		2.06	6.11		0.0709	0.1542	0.0071	0.0575		0.1014	0.2085	1.2744		100	100	100		N6-acetyllysine	Amino acid	Aspartate family (OAA derived)	100001734	C02727		92832	692-04-6	LC/MS neg	1059	187.109
	356	183	18245	Amino acid	Glutathione metabolism	gamma-glutamylhistidine		0.57	1.73		0.0499	0.1452	0.0393	0.1247		0.9297	0.5287	0.9169		100	100	100		gamma-glutamylhistidine	Amino acid	Glutathione metabolism	1235			7017195	37460-15-4	LC/MS pos early	2740	285.119
	362	188	33364	Amino acid	Glutathione metabolism	gamma-glutamylthreonine		1.03	2.11		0.7957	0.4464	0.0177	0.0767		0.4495	0.4629	0.9761		100	100	100		gamma-glutamylthreonine	Amino acid	Glutathione metabolism	100001314			76078708	5652-48-2	LC/MS pos early	1750	249.108
	366	94	1494	Amino acid	Glutathione metabolism	5-oxoproline		0.95	0.47		0.7283	0.4305	0.0027	0.0409		1.8882	1.7878	0.8381		100	100	100		5-oxoproline	Amino acid	Glutathione metabolism	1021	C01879	5-OXOPROLINE	7405	98-79-3	LC/MS neg	738.5	128.035
	371	179	55015	Amino acid	Glutathione metabolism	gamma-glutamyl-alpha-lysine		0.78	1.88		0.3391	0.2896	0.0378	0.1233		0.7462	0.5846	1.0965		100	100	100		gamma-glutamyl-alpha-lysine	Amino acid	Glutathione metabolism	100010901			65254		LC/MS pos early	2784	276.155
	374	196	48152	Carbohydrate	Glycolysis	glucose		1	1.33		0.9015	0.487	0.3651	0.385		0.7326	0.7355	0.9761		100	100	100		glucose	Carbohydrate	Glycolysis	572	C00031	CPD-3607	79025	50-99-7	LC/MS polar	2342	225.062
	383	197	15443	Carbohydrate	Glycolysis	glucuronate		1.42	1.21		0.0719	0.1548	0.113	0.2177		0.6551	0.9318	1.124		100	100	100		glucuronate	Carbohydrate	Glycolysis	100000257	C00191	GLUCURONATE	444791	207300-70-7	LC/MS polar	3233.3	193.035
	384	171	46896	Carbohydrate	Glycolysis	fructose 1,6-diphosphate/glucose 1,6-diphosphate/myo-inositol diphosphates		1.65	1.23		0.295	0.2685	0.251	0.3164		0.4735	0.7792	0.9583		100	100	100		fructose 1,6-diphosphate/glucose 1,6-diphosphate/myo-inositol diphosphates	Carbohydrate	Glycolysis	100002180	C00354	FRUCTOSE-16-DIPHOSPHATE			LC/MS neg	551	338.989
	385	244	527	Carbohydrate	Glycolysis	lactate		1.71	0.61		0.0352	0.1278	0.0047	0.047		0.8093	1.3847	0.8381		100	100	100		lactate	Carbohydrate	Glycolysis	482	C00186	L-LACTATE	612	79-33-4	LC/MS polar	1468.8	89.0244
	399	389	52303	Carbohydrate	TCA cycle	trans-aconitate		0.88	0.39		0.3134	0.2767	0.0055	0.0525		1.1915	1.0516	0.4109		100	100	0		trans-aconitate	Carbohydrate	TCA cycle	100001043	C02341	CPD-225	444212	4023-65-8	LC/MS pos early	1320	192.05
	402	110	528	Carbohydrate	TCA cycle	alpha-ketoglutarate		1.02	1.15		0.7972	0.4464	0.2645	0.323		0.8474	0.8643	0.9933		100	100	100		alpha-ketoglutarate	Carbohydrate	TCA cycle	93	C00026	2-ketoglutarate	51	305-72-6;328-50-7;22202-68-2	LC/MS polar	2700	145.014
	420	361	53237	Carbohydrate	Calvin cycle and pentose phosphate	sedoheptulose		0.64	1.02		0.1509	0.2069	0.8053	0.5662		1.4672	0.9339	0.951		100	100	100		sedoheptulose	Carbohydrate	Calvin cycle and pentose phosphate	100002619			5459879	3019-74-7	LC/MS polar	2255	209.067
	436	165	20699	Carbohydrate	Amino sugar and nucleotide sugar	erythritol		0.81	0.58		0.2052	0.2343	0.0163	0.074		1.3378	1.0824	0.6235		100	100	33		erythritol	Carbohydrate	Amino sugar and nucleotide sugar	100000846	C00503	2-C-METHYL-D-ERYTHRITOL-4-PHOSPHATE	222285	149-32-6	LC/MS polar	1491	167.056
	345	203	27727	Amino acid	Glutathione metabolism	glutathione, oxidized (GSSG)		2.12	2.11		0.044	0.1396	0.0031	0.0409		0.2162	0.4581	0.9664		100	100	100		glutathione, oxidized (GSSG)	Amino acid	Glutathione metabolism	448	C00127	GLUTATHIONE	65359	103239-24-3	LC/MS pos early	2667	613.159
	440	195	27681	Carbohydrate	Amino sugar and nucleotide sugar	glucosaminate		0.88	1.13		0.4822	0.3476	0.1446	0.2333		1.1845	1.0398	1.1753		100	100	100		glucosaminate	Carbohydrate	Amino sugar and nucleotide sugar	100001009	C03752		73563	3646-68-2	LC/MS pos early	1091	196.082
	451	352	15772	Carbohydrate	Amino sugar and nucleotide sugar	ribitol		0.96	0.58		0.7865	0.4454	0.0083	0.0619		1.2345	1.1811	0.6798		100	100	100		ribitol	Carbohydrate	Amino sugar and nucleotide sugar	100000406	C00474		6912	488-81-3	LC/MS polar	1789.6	151.061
	452	353	27731	Carbohydrate	Amino sugar and nucleotide sugar	ribonate		0.65	0.54		0.0033	0.0768	0.0311	0.1095		2.0202	1.3115	0.7088		100	100	100		ribonate	Carbohydrate	Amino sugar and nucleotide sugar	100001007	C01685		5460677	5336-08-03	LC/MS polar	2425	165.04
	454	398	38670	Carbohydrate	Amino sugar and nucleotide sugar	UDP-glucose/UDP-galactose		2.55	2.32		0.4226	0.3197	0.1747	0.2529		0.2658	0.6782	1.5725		0	67	100		UDP-glucose/UDP-galactose	Carbohydrate	Amino sugar and nucleotide sugar	100002997	C00029	UDP-GLUCOSE			LC/MS neg	645	565.05
	462	412	15581	Carbohydrate	Amino sugar and nucleotide sugar	xylose		1.19	0.94		0.3639	0.298	0.5388	0.4437		0.8424	0.9998	0.9421		100	100	100		xylose	Carbohydrate	Amino sugar and nucleotide sugar	826	C00181	XYLOSE	135191	609-06-3	LC/MS polar	1727	195.051
	474	286	46539	Carbohydrate	Amino sugar and nucleotide sugar	N-acetylglucosamine/N-acetylgalactosamine		1.71	1.15		0.0053	0.0768	0.0621	0.1637		0.5902	1.0088	1.1577		100	100	100		N-acetylglucosamine/N-acetylgalactosamine	Carbohydrate	Amino sugar and nucleotide sugar	100006435			24139		LC/MS pos early	715	222.097
	475	355	54671	Carbohydrate	Amino sugar and nucleotide sugar	ribulose/xylulose		1.6	1.16		0.0068	0.0768	0.2754	0.3315		0.4657	0.743	0.8633		0	100	100		ribulose/xylulose	Carbohydrate	Amino sugar and nucleotide sugar	100006122		D-XYLULOSE	5289590		LC/MS polar	1400	195.051
	484	135	37112	Carbohydrate	Inositol metabolism	chiro-inositol		1.36	1.17		0.1655	0.2151	0.1168	0.2177		0.6608	0.8983	1.0548		100	100	100		chiro-inositol	Carbohydrate	Inositol metabolism	100001859	C19891	CPD-8052		643-12-9	LC/MS polar	3191.2	225.062
	490	237	38388	Carbohydrate	Inositol metabolism	inositol pentakisphosphate		7.08	0.47		0.0685	0.1539	0.0909	0.1987		0.1987	1.4069	0.66		67	100	100		inositol pentakisphosphate	Carbohydrate	Inositol metabolism	100002880	C01284	CPD-534	439468		LC/MS neg	522	578.888
	491	236	39575	Carbohydrate	Inositol metabolism	inositol hexakisphosphate		8.31	0.53		0.1044	0.1783	0.1479	0.2333		0.1467	1.2191	0.6514		100	100	100		inositol hexakisphosphate	Carbohydrate	Inositol metabolism	421	C01204	MI-HEXAKISPHOSPHATE	890	83-86-3	LC/MS neg	527	658.854
	503	69	43805	Carbohydrate	Sucrose, glucose,fructose metabolism	3-deoxyoctulosonate		0.62	1.24		0.1487	0.2069	0.3849	0.3882		1.2636	0.7783	0.9681		100	33	100		3-deoxyoctulosonate	Carbohydrate	Sucrose, glucose,fructose metabolism	100000095		KDO	4636210	103404-70-2	LC/MS polar	2706.7	237.062
	508	170	48195	Carbohydrate	Sucrose, glucose,fructose metabolism	fructose		1.28	1.35		0.0861	0.1618	0.1151	0.2177		0.7409	0.9448	1.2746		100	100	100		fructose	Carbohydrate	Sucrose, glucose,fructose metabolism	878	C00095	Fructose	5984	57-48-7	LC/MS polar	2065	225.062
	510	173	34706	Carbohydrate	Sucrose, glucose,fructose metabolism	galactinol		1.18	0.99		0.2717	0.2537	0.868	0.5889		0.9196	1.0825	1.0743		100	100	100		galactinol	Carbohydrate	Sucrose, glucose,fructose metabolism	100000908	C01235	CPD-458	439451	16908-86-4	LC/MS polar	4656	341.109
	403	376	1437	Carbohydrate	TCA cycle	succinate		2.05	0.81		0.0143	0.1235	0.0099	0.0619		0.5025	1.0321	0.8341		100	100	100		succinate	Carbohydrate	TCA cycle	252	C00042	SUC	1110	110-15-6	LC/MS polar	3149	117.019
	536	263	48153	Carbohydrate	Sucrose, glucose,fructose metabolism	mannose		1.98	1.65		0.007	0.0768	0.0258	0.0992		0.3389	0.6708	1.1054		100	100	100		mannose	Carbohydrate	Sucrose, glucose,fructose metabolism	803	C00159	L-mannose	18950	3458-28-4	LC/MS polar	2200	225.062
	552	371	15960	Carbohydrate	Sucrose, glucose,fructose metabolism	stachyose		1.05	0.88		0.6651	0.4042	0.1748	0.2529		1.0656	1.1167	0.9788		100	100	100		stachyose	Carbohydrate	Sucrose, glucose,fructose metabolism	934	C01613	CPD-170	439531	10094-58-3	LC/MS neg	920	665.215
	553	378	1519	Carbohydrate	Sucrose, glucose,fructose metabolism	sucrose		1.08	1.63		0.5507	0.3726	0.0016	0.0336		0.5931	0.6413	1.0473		100	100	100		sucrose	Carbohydrate	Sucrose, glucose,fructose metabolism	935	C00089	SUCROSE	5988	57-50-1	LC/MS polar	3092	387.114
	561	408	37132	Carbohydrate	Sucrose, glucose,fructose metabolism	verbascose		1	1.24		0.9441	0.4951	0.0982	0.202		1.0007	1.0034	1.2453		100	100	100		verbascose	Carbohydrate	Sucrose, glucose,fructose metabolism	100001864	C08252	CPD-8065	441434	546-62-3	LC/MS neg	935	827.267
	576	268	46144	Carbohydrate	Sucrose, glucose,fructose metabolism	methyl glucopyranoside (alpha + beta)		1.28	1.14		0.1542	0.2069	0.1162	0.2177		0.8637	1.1016	1.261		100	100	100		methyl glucopyranoside (alpha + beta)	Carbohydrate	Sucrose, glucose,fructose metabolism	100005864					LC/MS pos early	832	212.113
	578	194	587	Carbohydrate	Sucrose, glucose,fructose metabolism	gluconate		0.8	0.47		0.3228	0.2826	0.0041	0.045		1.4669	1.1682	0.5527		100	100	100		gluconate	Carbohydrate	Sucrose, glucose,fructose metabolism	338	C00257	GLUCONATE	10690	527-07-1	LC/MS polar	2922	195.051
	439	260	38299	Carbohydrate	Amino sugar and nucleotide sugar	maltol		0.43	0.3		0.0143	0.1235	0.0163	0.074		3.1296	1.3386	0.4073		100	100	100		maltol	Carbohydrate	Amino sugar and nucleotide sugar	100002362	C11918		8369	118-71-8	LC/MS pos early	1896	127.039
	610	326	1336	Lipids	Free fatty acid	palmitate (16:0)		0.78	1.06		0.2409	0.2452	0.6048	0.4784		1.4605	1.1371	1.2048		100	100	100		palmitate (16:0)	Lipids	Free fatty acid	424	C00249	PALMITATE	985	57-10-3	LC/MS neg	5618	255.233
	634	313	52285	Lipids	Free fatty acid	oleate/vaccenate (18:1)		0.65	1.05		0.0462	0.1403	0.6797	0.5125		1.9156	1.2384	1.3016		100	100	100		oleate/vaccenate (18:1)	Lipids	Free fatty acid	100008930					LC/MS neg	5655	281.249
	637	162	33587	Lipids	Free fatty acid	eicosenoate (20:1)		0.81	1.03		0.2522	0.247	0.7994	0.5652		1.5547	1.2604	1.3019		100	100	100		eicosenoate (20:1)	Lipids	Free fatty acid	100001335	C16526	CPD-12189	5282768		LC/MS neg	5950	309.28
	646	246	1105	Lipids	Free fatty acid	linoleate (18:2n6)		0.58	1.24		0.1026	0.1774	0.4116	0.3957		2.2178	1.2966	1.6069		100	100	100		linoleate (18:2n6)	Lipids	Free fatty acid	180	C01595	LINOLEIC_ACID	5280450	60-33-3	LC/MS neg	5535	279.233
	650	247	34035	Lipids	Free fatty acid	linolenate [alpha or gamma; (18:3n3 or 6)]		0.62	1.17		0.1534	0.2069	0.6295	0.489		2.0408	1.2657	1.4758		100	100	100		linolenate [alpha or gamma; (18:3n3 or 6)]	Lipids	Free fatty acid	100001337	C06426	CPD-8117	5280934		LC/MS neg	5450	277.217
	667	56	37253	Lipids	Fatty acid, hydroxy	2-hydroxyglutarate		0.99	0.59		0.9367	0.494	0.0094	0.0619		1.2795	1.2628	0.7489		100	100	100		2-hydroxyglutarate	Lipids	Fatty acid, hydroxy	100002070	C02630	CPD-381	43	40951-21-1	LC/MS polar	3352.8	147.03
	684	57	32413	Lipids	Fatty acid, hydroxy	2-hydroxymyristate		1.38	0.98		0.0657	0.1539	0.8833	0.5928		0.8511	1.1765	1.1583		100	100	100		2-hydroxymyristate	Lipids	Fatty acid, hydroxy	100001180	C13790		1563	2507-55-3	LC/MS neg	5364	243.197
	687	59	35675	Lipids	Fatty acid, hydroxy	2-hydroxypalmitate		0.9	1.13		0.529	0.368	0.5551	0.4472		1.0752	0.963	1.0912		100	100	100		2-hydroxypalmitate	Lipids	Fatty acid, hydroxy	100001579			92836	764-67-0	LC/MS neg	5511.2	271.228
	690	60	17945	Lipids	Fatty acid, hydroxy	2-hydroxystearate		0.96	1.32		0.8261	0.4597	0.1803	0.2574		0.9785	0.9421	1.2474		100	100	100		2-hydroxystearate	Lipids	Fatty acid, hydroxy	1239	C03045		69417	629-22-1	LC/MS neg	5695	299.259
	695	58	54920	Lipids	Fatty acid, hydroxy	2-hydroxyoleate		0.62	1.19		0.0512	0.1468	0.2976	0.3449		1.4124	0.874	1.0437		100	100	100		2-hydroxyoleate	Lipids	Fatty acid, hydroxy	100010866			9796304	56472-29-8	LC/MS neg	5560	297.244
	702	97	38399	Lipids	Oxylipins	9,10-DiHOME		0.68	0.75		0.0872	0.1623	0.182	0.2574		1.7898	1.2189	0.9132		100	100	100		9,10-DiHOME	Lipids	Oxylipins	179	C14828		9966640	263399-34-4	LC/MS neg	5180	313.238
	737	328	52944	Lipids	Fatty acid ester	palmitoylcholine		0.69	0.48		0.1397	0.1997	0.0001	0.0103		3.15	2.1619	1.0322		100	100	100		palmitoylcholine	Lipids	Fatty acid ester	100009233			151731		LC/MS pos late	1482	342.337
	739	251	57463	Lipids	Fatty acid ester	linoleoylcholine*		0.53	0.6		0.0657	0.1539	0.0697	0.1761		3.1869	1.6903	1.015		100	100	100		linoleoylcholine*	Lipids	Fatty acid ester	100015760					LC/MS pos late	1388	366.337
	742	315	53260	Lipids	Fatty acid ester	oleoylcholine		0.54	0.45		0.079	0.1601	0.0014	0.0336		2.4705	1.324	0.599		100	100	100		oleoylcholine	Lipids	Fatty acid ester	100009331					LC/MS pos late	1449	368.352
	753	327	38165	Lipids	Fatty acid amide	palmitoyl ethanolamide		0.81	0.45		0.3822	0.3085	0.0015	0.0336		2.7398	2.2076	0.9895		100	100	100		palmitoyl ethanolamide	Lipids	Fatty acid amide	1489	C16512		4671	544-31-0	LC/MS pos late	1643	300.29
	754	250	52608	Lipids	Fatty acid amide	linoleoyl ethanolamide		0.58	0.83		0.0706	0.1542	0.3816	0.3882		2.9438	1.7041	1.4155		100	100	100		linoleoyl ethanolamide	Lipids	Fatty acid amide	100006726			5283446	68171-52-8	LC/MS neg	6150	322.275
	755	314	38102	Lipids	Fatty acid amide	oleoyl ethanolamide		0.62	0.69		0.0402	0.1364	0.0379	0.1233		ma	1.6377	1.1274		100	100	100		oleoyl ethanolamide	Lipids	Fatty acid amide	1137			5283454	11-58-0;111-58-0	LC/MS neg	6450	324.291
	844	28	52679	Lipids	Phospholipids	1-palmitoyl-2-linoleoyl-GPA (16:0/18:2)*		0.92	1.16		0.6041	0.3865	0.2935	0.3433		0.9729	0.8908	1.0308		100	100	100		1-palmitoyl-2-linoleoyl-GPA (16:0/18:2)*	Lipids	Phospholipids	100009070			9547167		LC/MS polar	920	671.466
	845	26	52694	Lipids	Phospholipids	1-palmitoyl-2-linolenoyl-GPA (16:0/18:3)*		1.03	1.19		0.7625	0.4365	0.2889	0.3418		0.9374	0.9679	1.1547		100	100	100		1-palmitoyl-2-linolenoyl-GPA (16:0/18:3)*	Lipids	Phospholipids	100009089					LC/MS polar	925	669.45
	529	261	15586	Carbohydrate	Sucrose, glucose,fructose metabolism	maltose		2.16	3.22		0.0179	0.1278	0.0041	0.045		0.1691	0.3651	1.1752		100	100	100		maltose	Carbohydrate	Sucrose, glucose,fructose metabolism	913	C00208	MALTOSE	10991489	6363-53-7	LC/MS polar	3329.4	387.114
	938	39	36810	Lipids	Lyso-phospholipids	1-stearoyl-GPA (18:0)		0.34	2.29		0.0687	0.1539	0.1256	0.2199		1.8998	0.6523	1.4928		100	33	100		1-stearoyl-GPA (18:0)	Lipids	Lyso-phospholipids	100001670			89567	325465-92-7;799268-65-8	LC/MS neg	5829	437.267
	943	35	33955	Lipids	Lyso-phospholipids	1-palmitoyl-GPC (16:0)		0.27	1.08		0.034	0.1278	0.6154	0.4829		4.6005	1.2241	1.3271		100	100	100		1-palmitoyl-GPC (16:0)	Lipids	Lyso-phospholipids	100001263		2-Acylglycero-Phosphocholines	86554	17364-16-8	LC/MS pos late	1525	496.34
	1012	206	43847	Lipids	Phospholipid Metabolism	glycerol 3-phosphate		0.56	0.97		0.0337	0.1278	0.7521	0.5473		1.4783	0.8299	0.807		100	100	100		glycerol 3-phosphate	Lipids	Phospholipid Metabolism	100000258	C00093	GLYCEROL-3P	754	29849-82-9	LC/MS pos early	580	173.021
	1015	207	37455	Lipids	Phospholipid Metabolism	glycerophosphoethanolamine		0.23	1		0.0192	0.1278				0.9013	0.2067	0.2067		100	33	0		glycerophosphoethanolamine	Lipids	Phospholipid Metabolism	100001620	C01233		123874	33049-08-0	LC/MS pos early	659	216.063
	1018	208	48857	Lipids	Phospholipid Metabolism	glycerophosphoglycerol		0.77	1.1		0.22	0.2405	0.2262	0.2919		1.0936	0.8434	0.9271		100	100	100		glycerophosphoglycerol	Lipids	Phospholipid Metabolism	100001619	C03274		439964		LC/MS pos early	520	247.058
	1025	137	34396	Lipids	Choline metabolism	choline phosphate		0.71	3.74		0.1282	0.1934	0.0007	0.0323		0.3573	0.2532	0.9465		100	100	100		choline phosphate	Lipids	Choline metabolism	267	C00588	PHOSPHORYL-CHOLINE	1014	72556-74-2	LC/MS pos early	700	184.073
	978	38	35305	Lipids	Lyso-phospholipids	1-palmitoyl-GPI (16:0)		0.36	1.17		0.0592	0.1539	0.5966	0.4741		6.053	2.1704	2.534		100	100	100		1-palmitoyl-GPI (16:0)	Lipids	Lyso-phospholipids	100001655					LC/MS neg	5564	571.289
	1091	320	54946	Lipids	Glycerolipids - Diacyl	oleoyl-oleoyl-glycerol (18:1/18:1) [2]*		1.4	1.17		0.1815	0.2217	0.0118	0.0659		0.6244	0.8768	1.0246		100	100	100		oleoyl-oleoyl-glycerol (18:1/18:1) [2]*	Lipids	Glycerolipids - Diacyl	100010919					LC/MS pos late	3695	638.572
	1104	248	54951	Lipids	Glycerolipids - Diacyl	linolenoyl-linolenoyl-glycerol (18:3/18:3) [1]*		0.54	0.61		0.06	0.1539	0.0913	0.1987		2.705	1.4741	0.8929		100	100	100		linolenoyl-linolenoyl-glycerol (18:3/18:3) [1]*	Lipids	Glycerolipids - Diacyl	100010932					LC/MS pos late	2229	630.509
	1112	2	54891	Lipids	Galactolipids	1,2-dilinolenoyl-galactosylglycerol (18:3/18:3)*		0.66	4.44		0.2494	0.2454	0.0296	0.106		0.2217	0.1462	0.6498		100	0	100		1,2-dilinolenoyl-galactosylglycerol (18:3/18:3)*	Lipids	Galactolipids	100010877	C13871		5282287		LC/MS pos late	2046	792.562
	1113	27	54887	Lipids	Galactolipids	1-palmitoyl-2-linoleoyl-digalactosylglycerol (16:0/18:2)*		0.58	2.43		0.1683	0.216	0.024	0.0958		1.4028	0.8139	1.9767		100	100	100		1-palmitoyl-2-linoleoyl-digalactosylglycerol (16:0/18:2)*	Lipids	Galactolipids	100010874					LC/MS pos late	2498	934.646
	1114	25	54893	Lipids	Galactolipids	1-palmitoyl-2-linolenoyl-digalactosylglycerol (16:0/18:3)		1	1							0.5235	0.5235	0.5235		0	0	33		1-palmitoyl-2-linolenoyl-digalactosylglycerol (16:0/18:3)	Lipids	Galactolipids	100010875					LC/MS pos late	2278	932.63
	1117	12	54896	Lipids	Galactolipids	1-linoleoyl-2-linolenoyl-digalactosylglycerol (18:2/18:3)*		0.87	1.28		0.4109	0.3197	0.5195	0.4349		1.4482	1.2604	1.6084		100	100	100		1-linoleoyl-2-linolenoyl-digalactosylglycerol (18:2/18:3)*	Lipids	Galactolipids	100010872					LC/MS pos late	2073	956.63
	1119	1	54892	Lipids	Galactolipids	1,2-dilinolenoyl-digalactosylglycerol (18:3/18:3)		0.71	0.93		0.4128	0.3197	0.708	0.5243		1.0679	0.7599	0.7082		100	100	100		1,2-dilinolenoyl-digalactosylglycerol (18:3/18:3)	Lipids	Galactolipids	100009392					LC/MS pos late	1941	954.615
	1120	176	57345	Lipids	Galactolipids	galactosylglycerol*		1.17	0.81		0.3076	0.2739	0.1813	0.2574		1.2897	1.5115	1.2192		100	100	100		galactosylglycerol*	Lipids	Galactolipids	100003064	C05401		16048618	16232-91-0	LC/MS neg	795	253.093
	1121	157	57346	Lipids	Galactolipids	digalactosylglycerol*		0.97	0.76		0.883	0.4807	0.1969	0.2738		1.2327	1.1963	0.9086		100	100	100		digalactosylglycerol*	Lipids	Galactolipids	100003065					LC/MS neg	781	415.146
	1122	369	17769	Lipids	Sphingolipid	sphinganine		0.77	6.86		0.3124	0.2767	1.6405e-05	0.0021		0.2285	0.1768	1.212		100	33	100		sphinganine	Lipids	Sphingolipid	313	C00836	DIHYDRO-SPHINGOSINE	3126	3102-56-5	LC/MS pos late	1413	302.305
	1187	305	594	Cofactors, Prosthetic Groups, Electron Carriers	Nicotinate and nicotinamide metabolism	nicotinamide		1.41	1.07		0.1561	0.2082	0.6934	0.5181		0.6324	0.8933	0.9579		100	100	100		nicotinamide	Cofactors, Prosthetic Groups, Electron Carriers	Nicotinate and nicotinamide metabolism	432	C00153	NIACINAMIDE	936	98-92-0	LC/MS pos early	1942	123.055
	1192	307	22152	Cofactors, Prosthetic Groups, Electron Carriers	Nicotinate and nicotinamide metabolism	nicotinamide ribonucleotide (NMN)		1.03	1.43		0.7219	0.4299	0.0135	0.0693		0.6486	0.6651	0.9481		100	100	100		nicotinamide ribonucleotide (NMN)	Cofactors, Prosthetic Groups, Electron Carriers	Nicotinate and nicotinamide metabolism	1312	C00455	NICOTINAMIDE_NUCLEOTIDE	14180	1094-61-7	LC/MS pos early	766	335.064
	1193	308	33013	Cofactors, Prosthetic Groups, Electron Carriers	Nicotinate and nicotinamide metabolism	nicotinamide riboside		0.88	1.79		0.5579	0.3727	2.4461e-06	0.0006		0.6832	0.5989	1.0702		100	100	100		nicotinamide riboside	Cofactors, Prosthetic Groups, Electron Carriers	Nicotinate and nicotinamide metabolism	100001310	C03150	NICOTINAMIDE_RIBOSE	439924	1341-23-7	LC/MS pos early	2040	255.098
	1194	309	1504	Cofactors, Prosthetic Groups, Electron Carriers	Nicotinate and nicotinamide metabolism	nicotinate		0.56	0.53		0.0078	0.0768	0.0276	0.1032		2.4292	1.3538	0.723		100	100	100		nicotinate	Cofactors, Prosthetic Groups, Electron Carriers	Nicotinate and nicotinamide metabolism	567	C00253	NIACINE	938	59-67-6	LC/MS pos early	1673	124.039
	1196	310	33471	Cofactors, Prosthetic Groups, Electron Carriers	Nicotinate and nicotinamide metabolism	nicotinate ribonucleoside		1.44	1.39		0.0452	0.1396	0.0168	0.0751		0.6589	0.9485	1.3214		100	100	100		nicotinate ribonucleoside	Cofactors, Prosthetic Groups, Electron Carriers	Nicotinate and nicotinamide metabolism	100001316	C05841	NICOTINAMIDE_RIBOSE	161234	2625-49-2	LC/MS pos early	1536	256.082
	1215	337	42109	Cofactors, Prosthetic Groups, Electron Carriers	Oxidative phosphorylation	phosphate		0.9	0.94		0.1998	0.2319	0.4222	0.3957		1.1286	1.0122	0.9494		100	100	100		phosphate	Cofactors, Prosthetic Groups, Electron Carriers	Oxidative phosphorylation	461	C00009	Pi	1061	7664-38-2	LC/MS pos early	576	98.9842
	1227	154	1659	Cofactors, Prosthetic Groups, Electron Carriers	Ascorbate metabolism	dehydroascorbate		1.34	1.03		0.1633	0.2149	0.9041	0.5966		0.663	0.8866	0.9157		100	100	100		dehydroascorbate	Cofactors, Prosthetic Groups, Electron Carriers	Ascorbate metabolism	301	C05422	L-DEHYDRO-ASCORBATE	835	490-83-5	LC/MS polar	1130	173.009
	1232	384	27738	Cofactors, Prosthetic Groups, Electron Carriers	Ascorbate metabolism	threonate		0.55	0.56		0.018	0.1278	0.0041	0.045		1.9629	1.0708	0.6034		100	100	100		threonate	Cofactors, Prosthetic Groups, Electron Carriers	Ascorbate metabolism	100001022	C01620	L-THREONATE	151152	70753-61-6	LC/MS polar	2384	135.03
	1240	90	27673	Cofactors, Prosthetic Groups, Electron Carriers	Thiamine metabolism	5-(2-Hydroxyethyl)-4-methylthiazole		0.61	0.37		0.0348	0.1278	0.0111	0.0646		1.8991	1.1504	0.424		100	100	100		5-(2-Hydroxyethyl)-4-methylthiazole	Cofactors, Prosthetic Groups, Electron Carriers	Thiamine metabolism	100000098	C04294	THZ	1136	137-00-8	LC/MS pos early	2310	144.048
	1256	345	2150	Cofactors, Prosthetic Groups, Electron Carriers	Vitamin B metabolism (B6 or B12)	pyridoxamine		0.56	0.66		0.0074	0.0768	0.0069	0.0575		1.9068	1.0633	0.6983		100	100	33		pyridoxamine	Cofactors, Prosthetic Groups, Electron Carriers	Vitamin B metabolism (B6 or B12)	568	C00534	PYRIDOXAMINE	1052	58052-48-5	LC/MS pos early	2975	169.097
	1258	347	608	Cofactors, Prosthetic Groups, Electron Carriers	Vitamin B metabolism (B6 or B12)	pyridoxine (Vitamin B6)		0.89	1.01		0.4366	0.3253	0.9007	0.5966		1.3823	1.2366	1.2545		100	100	100		pyridoxine (Vitamin B6)	Cofactors, Prosthetic Groups, Electron Carriers	Vitamin B metabolism (B6 or B12)	936	C00314	PYRIDOXINE	1054	58-56-0	LC/MS pos early	2442	170.081
	1273	47	1553	Nucleotide	Purine metabolism	2'-deoxyadenosine		0.88	1.35		0.4953	0.3505	0.0393	0.1247		0.8603	0.7562	1.021		100	100	100		2'-deoxyadenosine	Nucleotide	Purine metabolism	211	C00559	DEOXYADENOSINE	13730	16373-93-6	LC/MS pos early	2252	252.109
	1274	49	1411	Nucleotide	Purine metabolism	2'-deoxyguanosine		0.95	1.5		0.6425	0.3988	0.0097	0.0619		0.6625	0.6298	0.9445		100	100	100		2'-deoxyguanosine	Nucleotide	Purine metabolism	348	C00330	DEOXYGUANOSINE	187790	961-07-9	LC/MS neg	1751	266.089
	1281	98	554	Nucleotide	Purine metabolism	adenine		0.67	1.02		0.0383	0.1341	0.7816	0.5574		1.1528	0.7703	0.788		100	100	100		adenine	Nucleotide	Purine metabolism	880	C00147	ADENINE	190	73-24-5	LC/MS pos early	2221	136.062
	1283	100	36815	Nucleotide	Purine metabolism	adenosine 2'-monophosphate (2'-AMP)		1.16	0.79		0.7274	0.4305	0.5158	0.4347		0.807	0.9369	0.7399		100	100	100		adenosine 2'-monophosphate (2'-AMP)	Nucleotide	Purine metabolism	100001694	C00946	CPD-3705	94136	130-49-4	LC/MS neg	1497.7	346.056
	1288	103	37467	Nucleotide	Purine metabolism	adenosine-2',3'-cyclic monophosphate		0.79	0.77		0.3499	0.2916	0.2053	0.2778		1.1203	0.8895	0.6856		100	100	100		adenosine-2',3'-cyclic monophosphate	Nucleotide	Purine metabolism	72	C02353		2024	37063-35-7	LC/MS pos early	1000	330.06
	1291	107	33434	Nucleotide	Purine metabolism	allantoic acid		0.91	2.13		0.6156	0.3926	0.05	0.1406		0.4647	0.4236	0.9021		100	100	100		allantoic acid	Nucleotide	Purine metabolism	218	C00499	ALLANTOATE	203	99-16-1	LC/MS polar	2960	175.047
	1293	217	32352	Nucleotide	Purine metabolism	guanine		1.44	1.29		0.0663	0.1539	0.0143	0.0717		0.608	0.8783	1.1355		100	100	100		guanine	Nucleotide	Purine metabolism	172	C00242	GUANINE	764	73-40-5	LC/MS pos early	2032	152.057
	1296	221	2849	Nucleotide	Purine metabolism	guanosine 5'- monophosphate (5'-GMP)		0.99	0.95		0.9089	0.4878	0.6376	0.4911		0.9192	0.9101	0.8677		100	100	100		guanosine 5'- monophosphate (5'-GMP)	Nucleotide	Purine metabolism	347	C00144	GMP	6804	5550-12-09	LC/MS pos early	800	364.065
	1299	232	3127	Nucleotide	Purine metabolism	hypoxanthine		1.04	1.34		0.7964	0.4464	0.1283	0.2204		0.7315	0.7641	1.0214		100	100	100		hypoxanthine	Nucleotide	Purine metabolism	171	C00262	HYPOXANTHINE	790	68-94-0	LC/MS pos early	1295	137.046
	1305	275	35137	Nucleotide	Purine metabolism	N2,N2-dimethylguanosine		1.68	1.16		0.0055	0.0768	0.2895	0.3418		0.7148	1.2019	1.3969		100	100	100		N2,N2-dimethylguanosine	Nucleotide	Purine metabolism	100001412			92919	2140-67-2	LC/MS pos early	2210	312.13
	1308	278	37114	Nucleotide	Purine metabolism	N6-methyladenosine		2.05	0.25		0.0219	0.1278	0.0095	0.0619		1.1539	2.3648	0.5923		100	100	100		N6-methyladenosine	Nucleotide	Purine metabolism	213			1869	1867-73-8	LC/MS pos early	2264	282.12
	1250	192	52473	Cofactors, Prosthetic Groups, Electron Carriers	Tocopherol metabolism	gamma-tocopherol/beta-tocopherol		0.4	1.39		0.0359	0.1278	0.4737	0.4132		3.3316	1.3486	1.8789		100	100	100		gamma-tocopherol/beta-tocopherol	Cofactors, Prosthetic Groups, Electron Carriers	Tocopherol metabolism	100008998					LC/MS pos late	2384	416.364
	1310	409	3147	Nucleotide	Purine metabolism	xanthine		0.84	2.55		0.2341	0.243	0.0149	0.0718		1.0912	0.919	2.343		100	100	100		xanthine	Nucleotide	Purine metabolism	1004	C00385	XANTHINE	1188	69-89-6	LC/MS pos early	1032	153.041
	1311	410	15136	Nucleotide	Purine metabolism	xanthosine		0.85	0.85		0.4093	0.3197	0.4847	0.4184		1.3011	1.1083	0.9457		100	100	100		xanthosine	Nucleotide	Purine metabolism	100000299	C01762	XANTHOSINE	64959	146-80-5	LC/MS neg	1075	283.068
	1254	344	1651	Cofactors, Prosthetic Groups, Electron Carriers	Vitamin B metabolism (B6 or B12)	pyridoxal		2.23	1.76		0.1164	0.1839	0.157	0.2397		0.2664	0.5928	1.0408		100	100	100		pyridoxal	Cofactors, Prosthetic Groups, Electron Carriers	Vitamin B metabolism (B6 or B12)	491	C00250	PYRIDOXAL	1050	65-22-5	LC/MS pos early	2343	168.066
	1339	91	22119	Nucleotide	Pyrimidine metabolism	5-methylcytidine		1.9	1.02		0.0202	0.1278	0.7373	0.5429		0.6572	1.2466	1.2731		100	100	100		5-methylcytidine	Nucleotide	Pyrimidine metabolism	100000763			92918	2140-61-6	LC/MS pos early	2227	258.108
	1341	93	35136	Nucleotide	Pyrimidine metabolism	5-methyluridine (ribothymidine)		1.17	0.72		0.2752	0.2538	0.0099	0.0619		1.2211	1.4336	1.0375		100	100	100		5-methyluridine (ribothymidine)	Nucleotide	Pyrimidine metabolism	100001446			445408	1463-10-1	LC/MS neg	1778.1	257.078
	1343	149	514	Nucleotide	Pyrimidine metabolism	cytidine		1.37	1.06		0.0901	0.1662	0.3822	0.3882		0.8	1.0928	1.1574		100	100	100		cytidine	Nucleotide	Pyrimidine metabolism	827	C00475	CYTIDINE	6175	65-46-3	LC/MS pos early	2124	244.093
	1345	151	2959	Nucleotide	Pyrimidine metabolism	cytidine 3'-monophosphate (3'-CMP)		0.9	0.79		0.5148	0.3606	0.0373	0.1233		1.1636	1.0527	0.8342		100	100	100		cytidine 3'-monophosphate (3'-CMP)	Nucleotide	Pyrimidine metabolism	105	C05822		66535	84-52-6	LC/MS pos early	920	324.059
	1347	150	37465	Nucleotide	Pyrimidine metabolism	cytidine 2',3'-cyclic monophosphate		0.64	0.7		0.0358	0.1278	0.1151	0.2177		1.5129	0.962	0.6775		100	100	100		cytidine 2',3'-cyclic monophosphate	Nucleotide	Pyrimidine metabolism	73	C02354		417654	15718-51-1	LC/MS neg	937	304.034
	1351	322	1505	Nucleotide	Pyrimidine metabolism	orotate		1.26	0.65		0.0308	0.1278	0.0745	0.1845		0.7624	0.9628	0.6264		100	100	100		orotate	Nucleotide	Pyrimidine metabolism	445	C00295	OROTATE	967	50887-69-9	LC/MS polar	1638.1	155.01
	1352	323	35172	Nucleotide	Pyrimidine metabolism	orotidine		0.73	0.57		0.1955	0.2295	0.0093	0.0619		1.1837	0.8647	0.4907		100	100	33		orotidine	Nucleotide	Pyrimidine metabolism	100001416		OROTIDINE-5-PHOSPHATE	92751	314-50-1	LC/MS polar	2250	287.052
	1358	401	606	Nucleotide	Pyrimidine metabolism	uridine		1.18	1.37		0.1064	0.1802	0.0046	0.047		0.6535	0.7731	1.0572		100	100	100		uridine	Nucleotide	Pyrimidine metabolism	535	C00299	URIDINE	6029	58-96-8	LC/MS neg	1457.6	243.062
	1361	404	37137	Nucleotide	Pyrimidine metabolism	uridine-2',3'-cyclic monophosphate		0.6	1.11		0.0294	0.1278	0.6361	0.4911		1.327	0.802	0.8891		100	100	100		uridine-2',3'-cyclic monophosphate	Nucleotide	Pyrimidine metabolism	75	C02355		439715	40632-52-8	LC/MS neg	1090	305.018
	1363	125	55	Nucleotide	Pyrimidine metabolism	beta-alanine		1.15	0.97		0.5415	0.3705	0.9792	0.6136		0.8914	1.0231	0.9941		100	100	100		beta-alanine	Nucleotide	Pyrimidine metabolism	244	C00099	B-ALANINE	239	56-41-7;107-95-9	LC/MS pos early	1905	90.055
	1366	402	39764	Nucleotide	Pyrimidine metabolism	uridine 3'-monophosphate (3'-UMP)		0.69	0.7		0.0661	0.1539	0.1174	0.2177		1.4248	0.9796	0.6879		100	100	100		uridine 3'-monophosphate (3'-UMP)	Nucleotide	Pyrimidine metabolism	106	C01368		101543	35170-0-7;35170-03-7	LC/MS polar	3800	323.029
	1367	80	3155	Nucleotide	Pyrimidine metabolism	3-ureidopropionate		5.79	1.03		0.0041	0.0768	0.9549	0.6113		0.1713	0.9922	1.0245		33	100	100		3-ureidopropionate	Nucleotide	Pyrimidine metabolism	1053	C02642	3-UREIDO-PROPIONATE	111	462-88-4	LC/MS pos early	875	133.061
	1382	406	40475	Peptide	Dipeptide	valylglycine		0.89	1.27		0.6447	0.3988	0.4399	0.4019		0.9782	0.8701	1.1039		100	67	100		valylglycine	Peptide	Dipeptide	100003641			136487	686-43-1	LC/MS pos early	2444	175.108
	1408	143	18368	Peptide	Dipeptide	cys-gly, oxidized		1.63	1.71		0.0057	0.0768	0.0073	0.0575		0.4158	0.676	1.1586		100	100	100		cys-gly, oxidized	Peptide	Dipeptide	1224			333293	7729-20-6	LC/MS pos early	2947	355.074
	1414	342	40703	Peptide	Dipeptide	prolylglycine		1.1	1.32		0.5555	0.3726	0.0958	0.2007		0.7016	0.7719	1.0154		100	100	100		prolylglycine	Peptide	Dipeptide	100003674			6426709	2578-57-6	LC/MS pos early	2136	173.092
	1421	214	34398	Peptide	Dipeptide	glycylleucine		1.37	0.36		0.4982	0.3514	0.0716	0.1791		0.8594	1.1755	0.4256		100	100	33		glycylleucine	Peptide	Dipeptide	100001258	C02155		92843	869-19-2	LC/MS pos early	3059	189.123
	1472	241	40008	Peptide	Dipeptide	isoleucylglycine		1.86	1.03		0.079	0.1601	0.8411	0.5753		0.6127	1.138	1.1678		100	100	100		isoleucylglycine	Peptide	Dipeptide	100003169			342532	868-28-0	LC/MS neg	1992	187.109
	1480	386	31530	Peptide	Dipeptide	threonylphenylalanine		1.08	0.87		0.638	0.3988	0.4188	0.3957		1.0112	1.0875	0.9459		100	100	100		threonylphenylalanine	Peptide	Dipeptide	100001125			4099799	16875-27-7	LC/MS neg	2322	265.119
	1721	234	39613	Hormone metabolism	Auxin metabolism	indoleacetylaspartate		0.95	1.37		0.6975	0.4183	0.1236	0.2186		0.7709	0.7352	1.005		100	100	100		indoleacetylaspartate	Hormone metabolism	Auxin metabolism	100003110		INDOLE-3-ACETYL-ASP	446620	2456-73-7	LC/MS neg	1685	289.083
	1775	43	35892	Secondary metabolism	Benzenoids	2,4,6-trihydroxybenzoate		1.04	0.93		0.6284	0.3951	0.342	0.3722		1.0367	1.0797	1.0064		100	100	100		2,4,6-trihydroxybenzoate	Secondary metabolism	Benzenoids	100001718			66520	83-30-7	LC/MS neg	1574	169.014
	1780	84	21133	Secondary metabolism	Benzenoids	4-hydroxybenzoate		0.71	0.49		0.0827	0.1605	0.0027	0.0409		1.9589	1.3912	0.6749		100	100	100		4-hydroxybenzoate	Secondary metabolism	Benzenoids	100000862	C00156	4-hydroxybenzoate	135	99-96-7	LC/MS polar	1305	137.024
	1799	358	1515	Secondary metabolism	Benzenoids	salicylate		1.1	1		0.4897	0.3489	0.9498	0.6112		1.2231	1.3484	1.3459		100	100	100		salicylate	Secondary metabolism	Benzenoids	501	C00805	CPD-110	338	69-72-7	LC/MS polar	802	137.024
	2139	377	41888	Xenobiotics	Chemicals	succinimide		0.98	0.88		0.9373	0.494	0.459	0.4094		0.8854	0.8686	0.7664		100	100	100		succinimide	Xenobiotics	Chemicals	100003696	C07273		11439	123-56-8	LC/MS polar	2155	116.035
	2165	383	53231	Xenobiotics	Chemicals	thioproline		0.88	0.24		0.4116	0.3197	0.0019	0.0357		4.0669	3.5592	0.8566		100	100	100		thioproline	Xenobiotics	Chemicals	100009232		CPD0-1571	93176	34592-47-4	LC/MS pos early	1250	134.027
